1 **Title:** A tRNA-acetylating toxin and detoxifying enzyme in *Mycobacterium tuberculosis*.

2

3 **Authors:** Francesca G. Tomasi<sup>1</sup>, Alexander M. J. Hall<sup>2</sup>, Jessica T. P. Schweber<sup>1</sup>, Charles L. Dulberger<sup>1</sup>,  
4 Kerry McGowen<sup>1</sup>, Qingyun Liu<sup>1</sup>, Sarah M. Fortune<sup>1</sup>, Sophie Helaine<sup>2</sup>, Eric J. Rubin<sup>1</sup>

5 **Affiliations:** <sup>1</sup>Department of Immunology and Infectious Diseases Harvard T. H. Chan School of Public  
6 Health, Boston, MA USA; <sup>2</sup>Department of Microbiology, Harvard Medical School, Boston, MA, USA

7

8 **Abstract:** Toxin-antitoxin (TA) systems allow bacteria to adapt to changing environments without altering  
9 gene expression. Despite being overrepresented in *Mycobacterium tuberculosis* (*Mtb*), their individual  
10 physiological roles remain elusive. We describe a TA system in *Mtb* which we have named TacAT due  
11 to its homology to previously discovered systems in Salmonella. The toxin, TacT, blocks growth by  
12 acetylating glycyl-tRNAs and inhibiting translation. Its effects are reversed by the enzyme peptidyl tRNA  
13 hydrolase (Pth), which also cleaves peptidyl tRNAs that are prematurely released from stalled ribosomes.  
14 Pth is essential in most bacteria and thereby has been proposed as a promising drug target for complex  
15 pathogens like *Mtb*. Transposon sequencing data suggest that the *tacAT* operon is nonessential for *Mtb*  
16 growth *in vitro*, and premature stop mutations in this TA system present in some clinical isolates suggest  
17 that it is also dispensable *in vivo*. We assessed whether TacT modulates *pth* essentiality in *Mtb*, as drugs  
18 targeting Pth might be ineffective if TacAT is disrupted. We find that *pth* essentiality is unaffected by the  
19 absence of *tacAT*. These results highlight a fundamental aspect of mycobacterial biology and indicate  
20 that Pth's essential role hinges on its peptidyl-tRNA hydrolase activity. Our work underscores Pth's  
21 potential as a viable target for new antibiotics.

22

23 **Introduction:** *Mycobacterium tuberculosis* (*Mtb*), which causes tuberculosis (TB), is a leading cause of  
24 global infectious disease mortality[1]. *Mtb*'s ability to regulate its growth in different stressful conditions  
25 *in vitro* is thought to be an important part of its success *in vivo*. One of this pathogen's tools for growth  
26 regulation is an expansive network of toxin antitoxin (TA) systems, with at least 100 putative modules  
27 that encompass nearly 4% of *Mtb*'s coding capacity[2, 3]. Most of these systems in *Mtb* can be grouped

28 into five main mechanistic families based on sequence homology: VapBC, MazEF, RelBE, HigBA, and  
29 ParDE[4, 5]. Toxins of TAs are characterized by their general intracellular targets and mechanisms of  
30 activity with most known *Mtb* toxins being RNAses that cleave rRNA, mRNA, or tRNA.

31 Most *Mtb* toxins are classified as Type II toxin-antitoxins, the most widespread and heavily studied  
32 type. In these systems, a protein antitoxin is bound tightly to its cognate protein toxin and acts to  
33 neutralize it[6]. If the antitoxin is degraded, the toxin assumes its active form and blocks an essential  
34 process such as DNA replication or protein synthesis until antitoxin production resumes[6]. Despite being  
35 widespread in bacteria, the physiological roles of TA systems are just emerging, with some having been  
36 linked to plasmid maintenance, bacteriophage immunity, and the formation of dormant, antibiotic-tolerant  
37 persisters[7, 8]. TA systems might play a role in *Mtb*'s ability to withstand host and antibiotic pressures  
38 by controlling growth under different stress conditions[4, 9, 10]. However, it remains to be determined  
39 whether or to what extent they play a role in pathogenesis. A significant barrier to understanding TA  
40 systems is the challenge of directly measuring native toxin activity in cells, and therefore understanding  
41 when they are active and how they interact with other enzymes. Because of the nature of TA system  
42 autoregulation and post-translational control, transcription upregulation data alone do not necessarily  
43 indicate toxin activation[11]. So far, studies investigating TA systems in bacteria often measure activity  
44 in cells using ectopic overexpression constructs[4, 5, 12]. These studies offer fascinating mechanistic  
45 insights but do so in isolation from other intracellular systems, and it has been difficult to link the molecular  
46 mechanisms of TA systems to their biological roles.

47 Recently, a new class of TA systems called TacAT was discovered in *Salmonella* and homologs  
48 have since been identified in other species including *Escherichia coli* and *Klebsiella pneumoniae*[13-17].  
49 The TacT toxins in this family are GCN5-related N-acetyltransferases that acetylate aminoacyl tRNA and  
50 block incorporation of an amino acid into a growing peptide chain. TacT's unique mechanism of action –  
51 which can be detected using liquid chromatography-coupled mass spectrometry – makes it an appealing  
52 TA system to study in the context of bacterial physiology[13, 14, 18, 19]. An unusual aspect of TacAT  
53 systems is that, while the antitoxin can block toxin activity as seen with other TA systems, the effect can  
54 also be reversed via the ubiquitous and essential bacterial enzyme peptidyl tRNA hydrolase (Pth)[13,

55 14]. This enzyme cleaves acetylated amino acids from tRNA molecules, effectively unblocking protein  
56 synthesis. TacT's mechanistic connection to an essential enzyme makes it an appealing TA system to  
57 study in the context of gene essentiality.

58 Here we describe an *Mtb* homologue of the TacAT TA system, the first of its kind to be identified  
59 in this organism. We show that this TA system is encoded by the Rv0918-0919 operon and confirm that  
60 Rv0919 encodes a tRNA-acetylating toxin whose activity can be reversed by *Mtb* Pth (Rv1014c). While  
61 *pth* is required for growth in *Mtb*, transposon sequencing data suggest that the *Mtb* TacAT operon is  
62 dispensable for growth *in vitro*[20]. We have also identified premature stop mutations in this TA system  
63 in clinical isolates, suggesting it is not under positive selective pressure clinically. If TacT activity  
64 modulates *pth* essentiality in *Mtb*, then drugs targeting Pth might be ineffective if TacAT activity is  
65 disrupted, as has already happened in clinical isolates. However, we find that while the *tacAT* operon is  
66 indeed dispensable, *pth* essentiality is not, and its requirement for *Mtb* growth is unaffected by the  
67 absence of this TA system. Our results indicate that Pth's essential role in *Mtb* hinges on its function in  
68 cleaving peptidyl-tRNA and not acetylated aminoacyl tRNA. Our work underscores Pth's potential as a  
69 viable target for new antibiotics, while also highlighting multiple angles from which to study TA systems  
70 in *Mtb*.

71

## 72 **Results**

### 73 **Rv0918-0919 encodes a toxin-antitoxin system that inhibits growth by acetylating glycyl-tRNAs.**

74 Previous studies have identified over 100 putative TA systems in *Mtb*, based on genetic  
75 architecture and homology to known TA systems[5]. The *Mtb* operon Rv0918-0919 has been  
76 computationally flagged as a possible TA system due to its polycistronic organization and the presence  
77 of a conserved, DNA-binding RHH domain in the putative antitoxin gene, Rv0918 (Figure 1A)[5, 21].  
78 Rv0919 contains a conserved GNAT domain, and protein BLAST results show >50% sequence identity  
79 to the N-acetyltransferase TacAT toxins in *Salmonella* (Figure 1A)[22].

80 We hypothesized that Rv0919 encodes a TacT-like toxin that inhibits growth by blocking  
81 translation. The closely related but faster-growing, non-pathogenic model organism *Mycobacterium*

82 *smegmatis* (*Msmeg*) does not encode any putative TacAT-like systems[21, 22]. Therefore, to study *Mtb*  
83 TacT in isolation from other potential interacting genes we built an integrating vector carrying Rv0919  
84 under the control of an anhydrous tetracycline (aTC)-inducible promoter. Induced overexpression of  
85 Rv0919 in *Msmeg* inhibited growth (Figure 1B), while constitutive expression of the entire Rv0918-0919  
86 operon did not (Figure 1C), showing that Rv0919 encodes a growth-inhibiting enzyme that is not active  
87 in the presence of Rv0918.

88 We next assessed Rv0919 activity *in vitro* using a cell-free protein synthesis kit. We found that,  
89 while GFP could be efficiently expressed in this system, adding a DNA construct encoding Rv0919  
90 blocked synthesis, though only when acetyl co-enzyme A was added (Figure 1D). This suggests that  
91 Rv0919 uses acetyl co-enzyme A as an acetyl group donor, as has been seen with other TacAT  
92 systems[14]. A construct encoding Rv0919 with an active site mutation homologous to one identified in  
93 *Salmonella* (Y138F in *Mtb*) only partially abrogated protein synthesis, while Rv0919 with two different  
94 predicted catalytic site mutations (A91P and Y138F) had no ability to inhibit GFP synthesis, even in the  
95 presence of acetyl co-enzyme A (Figure 1E)[13]. These results suggest that Rv0919 inhibits growth by  
96 acetylating a component of the protein synthesis apparatus.

97 All other described TacAT-like systems encode a toxin that acetylates the amino acid on charged  
98 tRNA. Different organism toxins acetylate different tRNAs. For instance, in *Salmonella*, three different  
99 TacT-like toxins have been described. These block elongation by acetylating glycyl, isoleucyl-, leucyl-,  
100 and, to a lesser extent, other aminoacyl tRNAs *in vitro* [13] but solely glycyl-tRNA *in vivo* (in preparation).  
101 Meanwhile, in *E. coli*, the GNAT toxin AtaT was initially thought to block initiation of protein synthesis by  
102 acetylating methionine on initiator fMet-tRNA [17] but was more recently reported to acetylate  
103 preferentially glycyl-tRNA alongside others[19]. We hypothesized that *Mtb* TacT also acetylates charged  
104 tRNAs. To identify if any and which tRNA species might be affected by this enzyme, we purified total  
105 RNA from *Msmeg* overexpressing *Mtb* TacT and used liquid chromatography-coupled mass spectrometry  
106 (LCMS) to analyze tRNA acetylation (Figure 2A). A strong acetylation peak was detected for glycyl-tRNA  
107 (Figure 2B; Supplementary Table 1), but not for any other tRNAs, indicating that *Mtb* TacT specifically  
108 acetylates glycyl-tRNAs.

109

110 **Peptidyl tRNA hydrolase (Pth) reverses TacT-induced translation inhibition.**

111 Previous work has shown that the enzyme peptidyl tRNA hydrolase (Pth) detoxifies the effects of  
112 TacT acetylation by cleaving acetylated amino acids from corrupted tRNAs[14]. To test whether *Mtb* Pth  
113 reverses TacT activity, we purified recombinant *Mtb* Pth and added it to our cell-free protein synthesis  
114 assay (Supplementary Figure 1). Indeed, purified Pth was sufficient to rescue GFP expression in the  
115 presence of active *Mtb* TacT and acetyl coenzyme A (Figure 3B), but had no effects on translation in the  
116 presence of catalytically inactive TacT (Figure 3A,B). Thus, *Mtb* Pth also cleaves N-acetylated aminoacyl-  
117 tRNA thereby counteracting the effect of the toxin.

118

119 ***tacAT* does not affect *pth* essentiality in *Mtb*.**

120 In addition to reversing the effects of TacT-like toxins, Pth's primary known function is to cleave  
121 short peptides from peptidyl-tRNAs that are prematurely released from stalled ribosomes[23, 24]. As with  
122 other bacteria, transposon sequencing (TnSeq) data suggest that *pth* is essential in *Mtb*[20]. We built  
123 *Mtb pth* transcriptional knockdowns using CRISPR interference (CRISPRi)[25]. Cells induced for *pth*  
124 depletion show a marked growth defect, confirming that Pth is required for normal growth (Figure 4).  
125 Given TacAT's connection to this essential enzyme, we assessed whether it contributes to *pth* essentiality  
126 in *Mtb*.

127 Transposon sequencing data indicate that the TacAT operon Rv0918-0919 is nonessential for  
128 *Mtb* growth *in vitro*, and we have identified premature stop mutations in this TA system in clinical isolates,  
129 suggesting it is also dispensable *in vivo* (Supplementary Table 2)[20]. We built in-frame deletions of the  
130 *tacAT* operon in *Mtb* and used CRISPRi to deplete *pth* in this strain. In the absence of *tacAT*, *pth*  
131 knockdowns still failed to grow normally *in vitro*, suggesting that while the *tacAT* operon is dispensable,  
132 *pth* essentiality is unaffected by the absence of this TA system (Figure 4). We also performed LCMS on  
133 *Mtb* induced or uninduced for *pth* knockdown and were unable to detect glycyl-tRNA acetylation in either  
134 strain grown (Supplementary Figure 2). Thus, growth defects of a *pth* knockdown *in vitro* are not a result  
135 of the accumulation of acetylated glycyl-tRNAs.

136

## 137 **Discussion**

138 Toxin-antitoxin (TA) systems have been identified in most bacterial genomes and have been  
139 implicated in a variety of physiological functions ranging from phage protection and plasmid maintenance  
140 to pathogenesis and the general stress response. Interestingly, *Mycobacterium tuberculosis* (*Mtb*)  
141 encodes one of the largest repertoires of TA systems in bacteria, yet plasmids are absent from this  
142 organism [26]. Furthermore, the role of TA systems in *Mtb* against bacteriophages is still under study  
143 [27]. It is tempting to speculate that *Mtb*'s broad TA system toolkit serves as a growth regulator during  
144 human infection. However, experimental evidence for this is lacking, largely due to the difficulties of  
145 systematically deleting many genes simultaneously in *Mtb* and overlapping mechanisms of action that  
146 make it difficult to directly measure the activity of individual toxins. Some studies have examined the roles  
147 of individual TA systems in *Mtb* using genetic deletions and overexpression systems, and linked activity  
148 of some toxins to pathogenesis[10, 28, 29]. Nonetheless, the level and spectrum of TA system  
149 involvement during *Mtb* infection remains unresolved.

150 Here, we have identified and characterized a TA system in *Mtb* whose mechanism of action is  
151 distinct from the other known TA systems in this organism. While most toxins in *Mtb* are ribonucleases,  
152 TacT instead blocks growth by acetylating charged tRNAs. This activity can be detected using liquid  
153 chromatography-coupled mass spectrometry, making it an appealing TA system to study in its native  
154 form. We have shown that *Mtb* TacT acetylates glycyl tRNAs using an overexpression construct but have  
155 been unable to detect this modification in wild type *Mtb*. Future work that increases the sensitivity and  
156 throughput of LCMS-based or other forms of detection for tRNA acetylation will allow researchers to  
157 probe the effects of various physiological conditions on this tRNA modification and identify conditions  
158 during which TacT is activated in *Mtb* and in other bacteria containing homologous TA systems.

159 Recent work using genome sequence from clinical isolates of *Mtb* has shed light on the selective  
160 pressures imposed on *Mtb*'s genome during human infection[30, 31]. The essentiality of a gene is  
161 correlated with its level of tolerance for nonsynonymous mutations[32]. We have found that the TacAT  
162 operon in *Mtb* is dispensable *in vitro*, and clinical genomic data support that this operon is also

163 dispensable *in vivo*, given many nonsynonymous mutations – including premature stop codons – that  
164 have accumulated in clinical strains.

165         The other unique aspect of TacAT is its mechanistic connection to the essential enzyme peptidyl  
166 tRNA hydrolase (Pth), which reverses TacT-induced aminoacyl tRNA acetylation. Pth is ubiquitous and  
167 thought to be essential across bacteria; in fact, the three critical active site residues His22, Asp95 and  
168 Asn116 are universally conserved[33]. Archaea, meanwhile, encode a conserved functional homolog,  
169 *pth2*, which does not share significant sequence similarity to bacterial *pth*[33]. Most eukaryotes contain  
170 both *pth* and *pth2* genes, though these enzymes are individually nonessential. Interestingly, structural  
171 studies have found that mycobacterial Pth is divergent from other bacterial Pth in several regions[34, 35].  
172 Because of its essentiality in bacteria and unique structure in mycobacteria, in addition to the vulnerability  
173 of translation rescue systems in *Mtb*, Pth has been proposed as an intriguing drug target in difficult-to-  
174 treat organisms like *Mtb* [34, 36, 37]. Understanding the critical functions of Pth is important from a drug  
175 development perspective, especially when considering potential sources for antibiotic resistance. For  
176 instance, if TacT activity were a significant source for *pth* essentiality in *Mtb*, then inhibitors targeting Pth  
177 would lose efficacy in clinical isolates with a disrupted *tacAT* operon. Our work has shown that *Mtb* TacT's  
178 connection to Pth is not the source of *pth* essentiality. This bodes well for studies of Pth as an antibiotic  
179 target since mutations inactivating *tacAT* have already been identified in clinical isolates. Finally,  
180 biochemical assays to assess Pth inhibitors can exploit the relationship between Pth and TacT using *in*  
181 *vitro* protein synthesis kits by screening for loss of Pth-mediated detoxification.





195

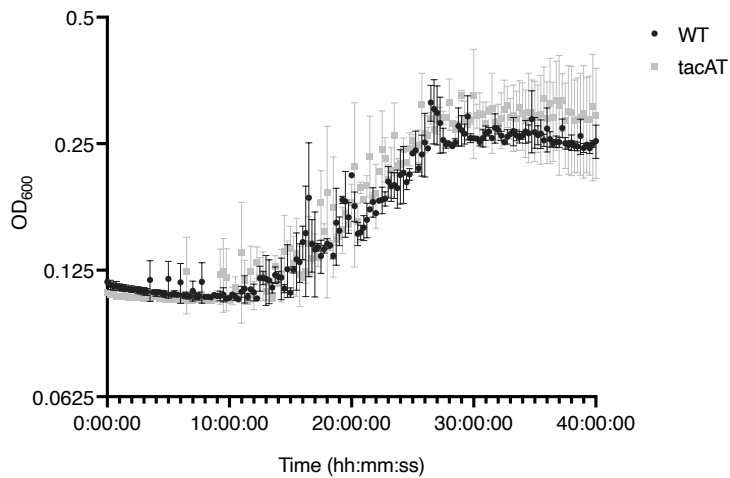

196

197

198 D. *Mtb* TacT blocks translation in the presence of acetyl coenzyme A. A TacT expression construct  
199 was added to the PURExpress in vitro Protein Synthesis Kit along with an eGFP expression  
200 construct. Protein synthesis was read out as eGFP synthesis and monitored  
201 spectrophotometrically at excitation of 488nm and emission of 509nm.

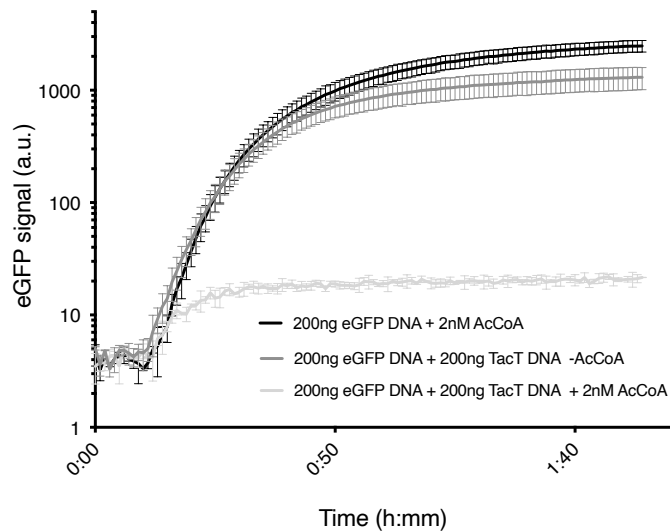

202

203

204 E. Active site mutations based on studies in *Salmonella* reduce *Mtb* TacT toxicity. Cell-free protein  
205 synthesis reactions were carried out as in (D). Inactive TacT was made using an Rv0919  
206 expression construct containing the active side residue mutation Y138F.

207

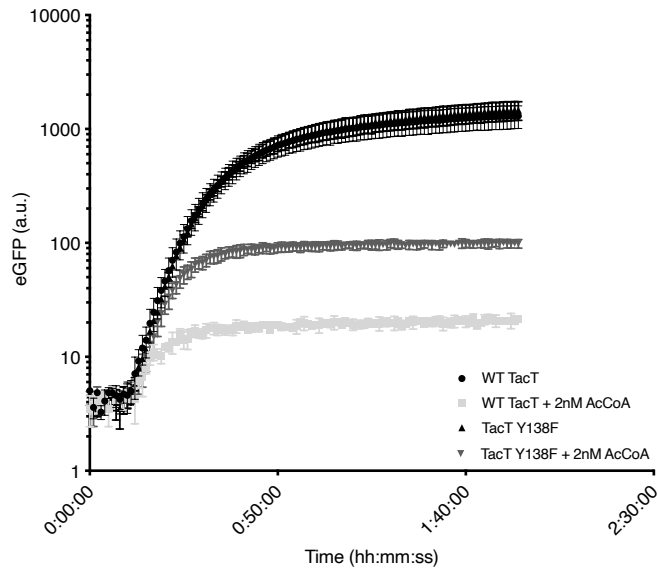

210 **Figure 2: TacT acetylates glycyl-tRNA.** *Msmeg* overexpressing *Mtb tacT* was grown to mid-log phase  
211 and induced for *tacT* overexpression for 3 hours. Total RNA from triplicate cultures was collected along  
212 with an uninduced control for liquid chromatography-mass spectrometry analysis as described. (A)  
213 Schematic of nuclease P1 treatment on tRNA samples prior to mass spectrometry. (B) The relative  
214 abundance of unacetylated versus N-acetylated glycine is shown as integrated mass spectra peaks  
215 normalized to standards.

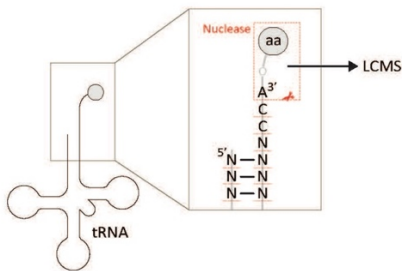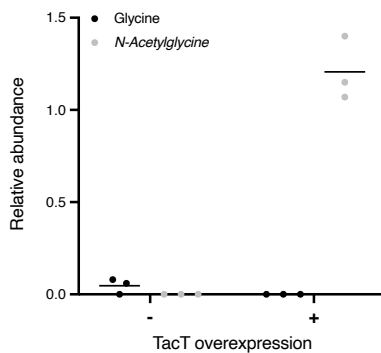

218 **Figure 3: *Mtb* Pth detoxifies TacT.** (A) Model of *Mtb* TacT dimer, with one monomer showing mutations  
219 for catalytic inactivation (Y138F and A91P; green). Acetyl coenzyme A is shown in the TacT binding  
220 pocket and colored by element. (B) Cell-free protein synthesis reactions were set up as described in  
221 Figure 1. Inactive TacT was made using an Rv0919 expression construct containing the active side  
222 residue mutations Y138F and A91P. Purified *Mtb* peptidyl tRNA hydrolase (Pth) was added where  
223 indicated (8uM). In reactions without Pth, an equal volume of storage buffer was added. Protein synthesis  
224 was read out as eGFP synthesis and monitored spectrophotometrically at excitation of 488nm and  
225 emission of 509nm.

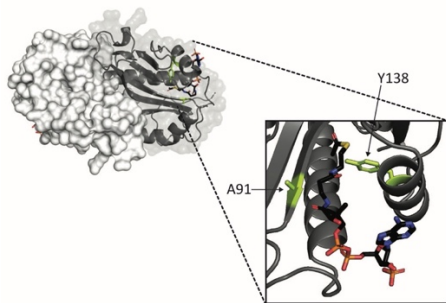

226 A.

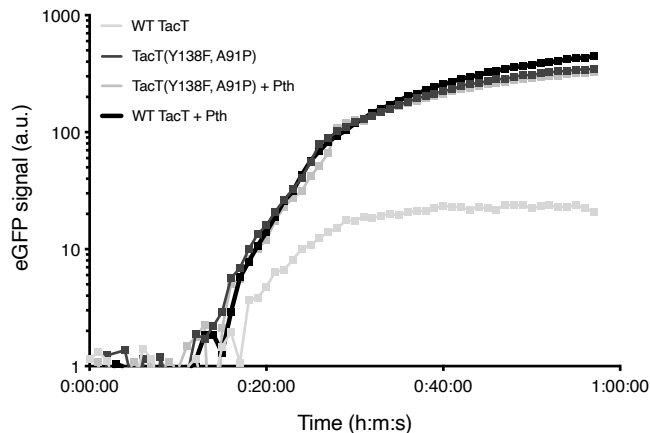

227 B.

228 **Figure 4: *pth* is still required for normal growth of a *Mtb tacAT* knockout.**

229 A. *Mtb* $\Delta$ *tacAT* and WT *Mtb* (H37Rv; parental strain) were transformed with *pth* knockdown  
230 constructs using mycobacterial CRISPR-interference (CRISPRi). Strains were diluted to an  
231 OD600 of 0.001 and either induced for *pth* knockdown (100ng/mL aTC) or uninduced. Growth  
232 was measured by optical density at 600nm.

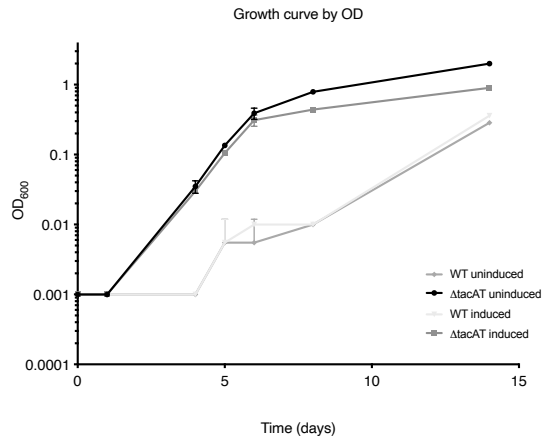

233

234

B. Changes in *pth* transcript levels during knockdown, as measured by RT-qPCR. Relative fold change of each mRNA was quantified by normalization to levels of *Mtb sigA* transcript. Points represent the mean of three biological replicates, with error bars depicting standard deviation.

235

236

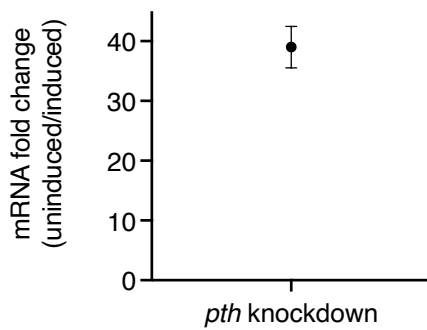

237

238

239 **Supplementary Figure 1: *Mtb* Pth purification gels.**

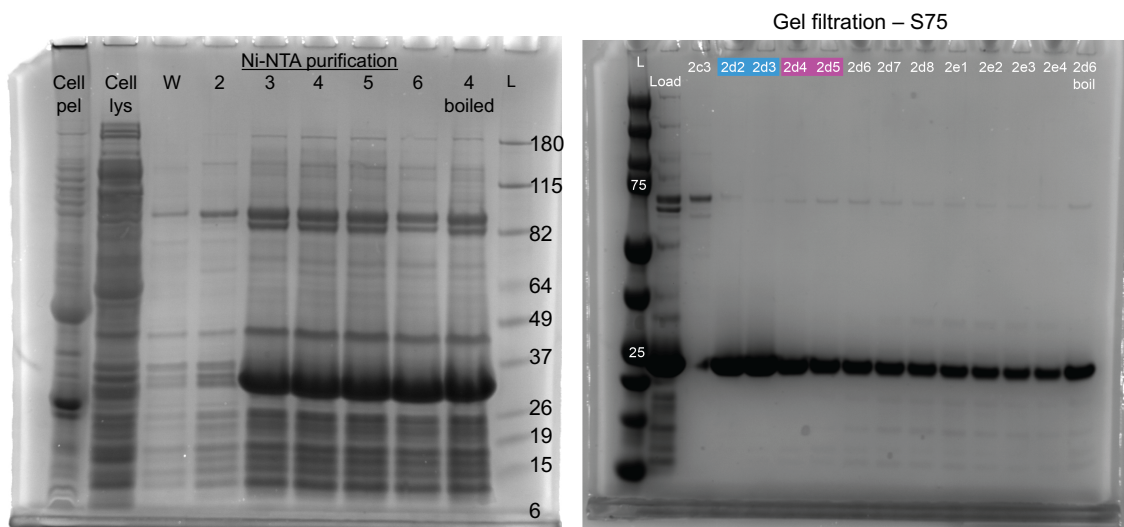

240

241

242 **Supplementary Table 1: Raw LCMS data.**

243

244 **Supplementary Table 2: Premature stop mutations in the *tacAT* operon have been detected in**  
245 **clinical *Mtb* isolates (51,229 isolates screened).**

246

247 **Supplementary Figure 2: TacT is not active in normal *Mtb* laboratory growth conditions. WT *Mtb***  
248 **was induced for *pth* depletion and incubated for 4 days. Total RNA from duplicate cultures was collected**  
249 **along with an uninduced control for liquid chromatography-mass spectrometry analysis as described in**  
250 **the Materials and Methods. The relative abundance of unacetylated versus N-acetylated glycine is shown**  
251 **as integrated mass spectra peaks normalized to standards.**

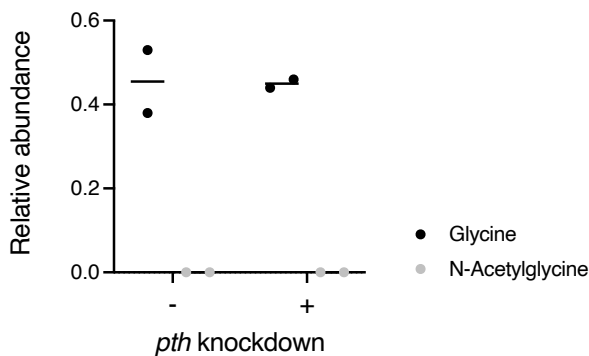

252

253

254 **Supplementary Figure 3: Distinction between acetylated seryl-tRNA and glutamine tRNA. RNA**  
255 **samples treated with Pth were compared to purified standards of each amino acid as described in the**  
256 **Materials and Methods.**

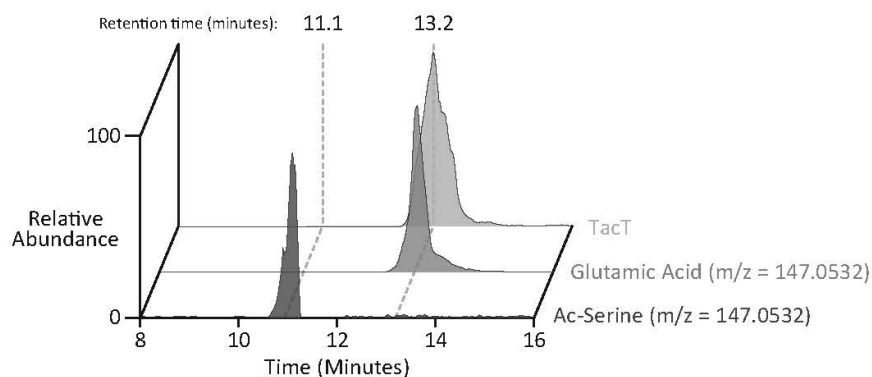

257

258 MATERIALS AND METHODS

259 **Bacterial strains and growth conditions:** *Mtb* and *Msmeg* strains were grown from frozen stocks into  
260 Middlebrook 7H9 medium supplemented with 0.2% glycerol, 0.05% Tween-80, and ADC (5g/L bovine  
261 serum albumin, 2g/L dextrose, 3  $\mu\text{g/ml}$  catalase). Cultures were incubated at 37 °C. Antibiotics or  
262 inducing agents were used when needed at the following concentrations in both *Mtb* and *Msmeg*:  
263 kanamycin (25 $\mu\text{g/ml}$ ), anhydrous tetracycline (aTC; 100ng/mL), hygromycin (50 $\mu\text{g/ml}$ ), and  
264 nourseothricin (20 $\mu\text{g/ml}$ ). Transformed *Mtb* and *Msmeg* strains were plated onto 7H10 agar plates with  
265 the appropriate antibiotic(s). Strains were grown to mid log-phase for all experiments unless otherwise  
266 specified (OD<sub>600</sub> 0.4-0.6). *E. coli* strains for cloning or protein purification were grown in LB broth or on  
267 LB agar with appropriate antibiotics at the following concentrations: kanamycin (50  $\mu\text{g/ml}$ ), zeocin  
268 (50 $\mu\text{g/ml}$ ), and nourseothricin (40  $\mu\text{g/ml}$ ). Induction time for *pth* depletion in *Mtb* was 4 days. Induction  
269 for *tacT* overexpression in *Msmeg* was 3 hours.

270  
271 **Bacterial strain construction:** Supplementary Table 3 depicts the strains, plasmids, primers, and  
272 recombinant DNA used for this study. Plasmids were built by restriction digest of a parental vector and  
273 inserts were prepared either by restriction enzyme cloning or Gibson assembly [38] using 40bp  
274 overhangs, as specified in Supplementary Table 3. Plasmids were isolated from *E. coli* and confirmed  
275 via Sanger sequencing carried out by Genewiz, LLC (Massachusetts, USA).

276  
277 Deletion mutants: The knockout strain  $\Delta\text{tacAT}::\text{zeo}$  (zeocin) was built using double-stranded  
278 recombineering in the parental *Mtb* strain H37Rv. A linear dsDNA fragment was constructed using stitch  
279 PCR with the primers listed in Supplementary Table 3 which consisted of a 500bp region upstream of the  
280 *tacAT* operon (Rv0918-019), 500bp downstream region, and a *lox-zeo-lox* fragment. This cassette was  
281 transformed into an H37Rv recombineering strain as described [39] and plated on 7H10 + zeocin plates.

282

283 *tacAT*, *tacT* alleles: Plasmid FT2, used for inducible *tact* overexpression in *Msmeg*, was generated using  
284 a parental vector (CT16) that integrates into the L5 mycobacterial phage site. This plasmid also encodes  
285 for kanamycin resistance and contains both the tet promoter (directly upstream of *tacT*) and the tet

286 repressor. CT16 was digested with ClaI and XbaI (New England Biolabs). *tacT* (Rv0919) was PCR-  
287 amplified and ligated into the plasmid using restriction cloning. Plasmid FT3, used for *tacAT*  
288 overexpression, was generated by placing *tacAT* together under the constitutive UV15 promoter in a  
289 parental vector (CT250) which was digested with NdeI and HindIII (New England Biolabs). The *tacAT*  
290 operon Rv0918-0919 was ligated to the plasmid using Gibson cloning.

291

292 Pth-knockdown constructs: Transcriptional knockdown of *pth* was accomplished using mycobacterial  
293 CRISPRi-interference (CRISPRi). Knockdown constructs were built as previously described [25] by  
294 annealing oligos for *pth* and ligating them into a linearized BsmBI-digested plasmid (CT 296; gift of  
295 Jeremy Rock) that contains mycobacterial CRISPRi. The knockdown vector FT110 was transformed in  
296 both H37Rv wild type (WT) and  $\Delta$ tacAT::ZeoR.

297

298 **Purification of *Mtb* Pth:** *Mtb pth* (Rv1014c) was cloned with a C-terminal 6x His-tag and expressed from  
299 pET28a in BL21-CodonPlus (DE3)-RP *E. coli* under conditions similar to those previously described[40].  
300 1 L of log-phase culture (OD600 ~ 0.7) was induced with 1 mM isopropyl  $\beta$ -D-1-thiogalactopyranoside  
301 (IPTG) for 4 hours at 37°C. Cells were harvested at 6,000g for 15 minutes, and the resulting pellet was  
302 frozen at -80°C. The pellet was thawed with a stir-bar at 4°C in lysis buffer containing 50 mM Tris HCl pH  
303 7.5, 300 mM NaCl, 10% glycerol, a pinch of DNase powder, 1 tablet ecomplete EDTA-free protease  
304 inhibitor and 2 mM 2-mercaptoethanol (BME), and cells were lysed using a French press. Lysate was  
305 clarified by spinning at 30,000g for 30 minutes and brought up to 20 mM imidazole pH 7.5. His-tagged  
306 Pth was then extracted via batch binding 2.5 mL equilibrated Ni-NTA beads incubated with lysate for 1  
307 hour at 4°C. Beads were collected and washed with 20 mL lysis buffer containing 2 mM BME. A second  
308 wash included 20 mL lysis buffer with 20 mM imidazole and 2 mM BME, followed by 5 mL of lysis buffer  
309 with 30 mM imidazole, and a final wash with 5 mL lysis buffer containing 40 mM imidazole and 2 mM  
310 BME. Samples were eluted with lysis buffer containing 200 mM imidazole pH 7.5 in 750  $\mu$ L fractions and  
311 analyzed via SDS-PAGE (Supplementary Figure 1, left). The cleanest elution fractions (4-6 and 7-9) were  
312 desalted into lysis buffer containing BME, concentrated with a 10 KDa MWCO amicon ultra 4 spin column

313 to 1 mL and further purified by FPLC via gel filtration chromatography with a Superdex 75 Increase 10/300  
314 GL column in buffer containing (25 mM Tris-HCl pH 7.5, 150 mM NaCl, 2 mM BME). Fractions were  
315 analyzed via SDS-PAGE (Supplementary Figure 1, right) and fractions 2d2-2d3 (at an elution volume  
316 ~13 mL) were pooled and brought up to 5% glycerol with 2 mM fresh BME. Nanodrop readings suggested  
317 that other fractions containing what appeared to be pure Pth were contaminated by unknown nucleic acid  
318 species. Nucleic acid-free protein (fractions 2d2-2d3) was aliquoted into 10 uL aliquots, flash frozen with  
319 liquid nitrogen, and stored at -80°C. Pth protein concentration was calculated using a Coomassie Plus  
320 (Bradford) Assay (Pierce).

321

322 ***In vitro* translation:** To assess the effect of TacT on translation, *in vitro* translation reactions were  
323 prepared with purified *tacT* DNA (WT, Y138F, or Y138F/A91P), 2nM acetyl coenzyme A, and purified  
324 Pth. A master mix of purified eGFP DNA (200ng per reaction), *tact* DNA (180ng per reaction) and  
325 PURExpress (New England Biolabs) components were prepared in triplicate reactions with 8µM of Pth  
326 and 2nM acetyl coenzyme A. When no Pth was added, an equal volume of storage buffer was used in  
327 place of protein. When no acetyl coenzyme A was added, an equal volume of water was added.  
328 Reactions were carried out in 12µL in a black Co-star 384-well plate for 2 hours at 37°C, and eGFP  
329 fluorescence (excitation = 488 nm and emission = 509 nm) was measured over time on a SpectraMax  
330 M2 microplate reader.

331

332 **mRNA quantification:** 10mL *Mtb* cultures were harvested at 4,000rpm for 10 minutes and pellets were  
333 resuspended in 1mL TriZol reagent (ThermoFisher Scientific). Samples were lysed by bead beating.  
334 Purified DNase-treated RNA was used as template for cDNA synthesis, following manufacturer's  
335 instructions with Superscript IV (Life Technologies). RNA was removed using RNase A (ThermoFisher  
336 Scientific) and cDNA cleaned up by column purification (Zymo Research). qPCR was performed using  
337 iTaq Universal SYBR Green Supermix (BioRad). mRNA fold-change was calculated using the  $\Delta\Delta Ct$   
338 method, where *pth* transcript level was normalized by *sigA* level in each condition.

339



340 **Liquid chromatography-coupled mass spectrometry:** Purified RNA (15 – 50 µg) was incubated with  
341 1U Nuclease P1 in 10mM ammonium acetate for 30 minutes at 25 °C (Figure 2 and Supplementary  
342 Figure 2), or with 25 µg purified Pth in buffer (10 mM Tris acetate, 10mM magnesium acetate, 20mM  
343 ammonium acetate pH 8.) for 1 hour at 37 °C (Supplementary Figure X). Processed RNA samples were  
344 diluted 1:3 with acetonitrile + 0.2% v/v acetic acid, centrifuged for 10 minutes at 21,000 g, room  
345 temperature to remove any precipitate, and transferred to glass microvials. Samples were analysed on a  
346 Thermo Ultimate 3000 LC coupled with a Q-Exactive Plus mass spectrometer in both positive and  
347 negative ion modes. Five microliters of each sample were injected on a Zic-pHILIC Column (150x2.1 mm,  
348 5 micron particles, EMD Millipore). The mobile phases are (A) 20 mM ammonium carbonate in 0.1 %  
349 ammonium hydroxide and (B) acetonitrile 97% in water. The gradient conditions were as follows: 100%  
350 B at 0 min, 40% B at 20 min, 0% B at 30 min for 5 min, then back to 100% B in 5 min, followed by 10 min  
351 of re-equilibration. A constant flow rate of 0.200 L/minute was used. The mass spectrometer was  
352 calibrated immediately prior to use. Data were analyzed using Thermo Xcalibur 3.0 with ICIS automated  
353 peak integration (Default settings: Smoothing Points = 9; Baseline Window = 40; Area Noise Factor = 2;  
354 Peak Noise Factor = 10) followed by manual data curation. To distinguish the isobaric molecules N-  
355 acetylserine and glutamic acid using LCMS, RNA samples treated with Pth were compared to purified  
356 standards of each amino acid. These data indicate that glutamic acid, and not N-acetylserine, contributes  
357 the entirety of the MS signal detected for molecules with a mass of 147.0532 (Supplementary Figure 3).

358

359 **Whole genome sequencing analysis of clinical isolates:** Whole genome sequences of 55778 Mtb  
360 isolates were obtained from 211 BioProjects under the following accession codes: ERP001037, ERP002611,  
361 ERP008770, PRJDB10607, PRJDB3875, PRJDB6149, PRJDB7006, PRJDB8544, PRJDB8553, PRJEB10385, PRJEB10533, PRJEB10577,  
362 PRJEB10950, PRJEB11460, PRJEB11653, PRJEB11778, PRJEB12011, PRJEB12179, PRJEB12184, PRJEB12764, PRJEB13325,  
363 PRJEB13764, PRJEB13960, PRJEB14199, PRJEB15076, PRJEB15382, PRJEB15857, PRJEB18529, PRJEB20214, PRJEB21685,  
364 PRJEB21888, PRJEB21922, PRJEB23245, PRJEB23495, PRJEB2358, PRJEB23648, PRJEB23664, PRJEB23996, PRJEB24463,  
365 PRJEB25506, PRJEB25543, PRJEB25592, PRJEB25814, PRJEB25968, PRJEB25971, PRJEB25972, PRJEB25991, PRJEB25997,  
366 PRJEB25998, PRJEB25999, PRJEB26000, PRJEB26001, PRJEB26002, PRJEB27244, PRJEB27354, PRJEB27366, PRJEB27446,  
367 PRJEB27847, PRJEB2794, PRJEB28497, PRJEB28842, PRJEB29199, PRJEB29276, PRJEB29408, PRJEB29435, PRJEB29446,  
368 PRJEB29604, PRJEB30463, PRJEB30782, PRJEB30933, PRJEB31023, PRJEB31905, PRJEB32037, PRJEB32234, PRJEB32341,

369 PRJEB32589, PRJEB32684, PRJEB32773, PRJEB33896, PRJEB35201, PRJEB39699, PRJEB40777, PRJEB5162, PRJEB5280,  
370 PRJEB5899, PRJEB5925, PRJEB6273, PRJEB6717, PRJEB6945, PRJEB7056, PRJEB7281, PRJEB7669, PRJEB7727, PRJEB7798,  
371 PRJEB8311, PRJEB8432, PRJEB8689, PRJEB9003, PRJEB9201, PRJEB9206, PRJEB9308, PRJEB9545, PRJEB9680, PRJEB9709,  
372 PRJEB9976, PRJNA200335, PRJNA217391, PRJNA219826, PRJNA220218, PRJNA229360, PRJNA233386, PRJNA235852, PRJNA237443,  
373 PRJNA244659, PRJNA254678, PRJNA259657, PRJNA268900, PRJNA270137, PRJNA282721, PRJNA287858, PRJNA295328,  
374 PRJNA300846, PRJNA302362, PRJNA305488, PRJNA306588, PRJNA308536, PRJNA318002, PRJNA352769, PRJNA353873,  
375 PRJNA354716, PRJNA355614, PRJNA356104, PRJNA361483, PRJNA369219, PRJNA376471, PRJNA377769, PRJNA379070,  
376 PRJNA384604, PRJNA384765, PRJNA384815, PRJNA385247, PRJNA388806, PRJNA390065, PRJNA390291, PRJNA390471,  
377 PRJNA393378, PRJNA393923, PRJNA393924, PRJNA401368, PRJNA401515, PRJNA407704, PRJNA413593, PRJNA414758,  
378 PRJNA419964, PRJNA421323, PRJNA421446, PRJNA428596, PRJNA429460, PRJNA430531, PRJNA431049, PRJNA436223,  
379 PRJNA436997, PRJNA438921, PRJNA448595, PRJNA453687, PRJNA454477, PRJNA475130, PRJNA475771, PRJNA480117,  
380 PRJNA480888, PRJNA481625, PRJNA481638, PRJNA482095, PRJNA482716, PRJNA482865, PRJNA486713, PRJNA488343,  
381 PRJNA488426, PRJNA492975, PRJNA506272, PRJNA509547, PRJNA512266, PRJNA522942, PRJNA523164, PRJNA523499,  
382 PRJNA524863, PRJNA526078, PRJNA528965, PRJNA533314, PRJNA540911, PRJNA549270, PRJNA559678, PRJNA566379,  
383 PRJNA573497, PRJNA578162, PRJNA586859, PRJNA587747, PRJNA589048, PRJNA591498, PRJNA595834, PRJNA598949,  
384 PRJNA598981, PRJNA608715, PRJNA632617, PRJNA663350, PRJNA678116, PRJNA679443, PRJNA683067, PRJNA684613,  
385 PRJNA688213, SRA065095. The Sickle tool was used for trimming whole-genome sequencing data[41].  
386 Sequencing reads with Phred base quality scores above 20 and read lengths longer than 30 were kept  
387 for analysis. The inferred ancestral genome of the most recent common ancestor of the MTBC was used  
388 as the reference template for read mapping[42]. Sequencing reads were mapped to the reference  
389 genome using Bowtie 2 (version 2.2.9) [43] . SAMtools (v1.3.1) was used for SNP calling with mapping  
390 quality greater than 30. Fixed mutations (frequency  $\geq 75\%$ ) were identified using VarScan (v2.3.9) with  
391 at least 10 supporting reads and the strand bias filter option on. SNPs in repetitive regions of the genome  
392 (e.g., PPE/PE-PGRS family genes, phage sequences, insertion or mobile genetic elements) were  
393 excluded [44, 45].

394

### 395 **Data availability statement**

396 The data that support these findings are available from the corresponding author upon reasonable  
397 request.

398

### 399 **Author contributions**

400 Conceptualization: F.G.T., J.T.P.S., E.J.R.; Methodology: F.G.T, A.M.J.H., J.T.P.S., C.L.D., K.M.; Investigation:  
401 F.G.T., A.M. J.H., J.T.P.S., C.L.D., K.M.; Data Curation: F.G.T., A.M. J.H., Q.L. Writing – Original Draft: F.G.T.,  
402 E.J.R.; Writing – Review & Editing: F.G.T., A.M. J.H., J.T.P.S., C.L.D., K.M., Q.L., S.M.F., S.H., E.J.R.

403

#### 404 **Funding**

405 This work was supported by the Office of the Assistant Secretary of Defense for Health Affairs, through  
406 the Peer Reviewed Medical Research Program, Focused Program Award under Award No. W81XWH-  
407 17-1-0692. Opinions, interpretations, conclusions, and recommendations are those of the author and are  
408 not necessarily endorsed by the Department of Defense.

409

410 Research reported in this publication was supported by the National Institute of Allergy And Infectious  
411 Diseases of the National Institutes of Health under Award Number P01AI095208. The content is solely  
412 the responsibility of the authors and does not necessarily represent the official views of the National  
413 Institutes of Health.

414

#### 415 **Conflicts of interest**

416 The authors declare no conflicts of interest.

417

#### 418 **References**

- 419 1. W.H.O., *Global tuberculosis report 2021*. 2021.
- 420 2. Fernandez-Garcia, L., et al., *Toxin-Antitoxin Systems in Clinical Pathogens*. Toxins (Basel), 2016.  
421 **8**(7).
- 422 3. Gupta, A., et al., *Co-expression network analysis of toxin-antitoxin loci in Mycobacterium*  
423 *tuberculosis reveals key modulators of cellular stress*. Sci Rep, 2017. **7**(1): p. 5868.
- 424 4. Slayden, R.A., C.C. Dawson, and J.E. Cummings, *Toxin-antitoxin systems and regulatory*  
425 *mechanisms in Mycobacterium tuberculosis*. Pathog Dis, 2018. **76**(4).
- 426 5. Sala, A., P. Bordes, and P. Genevaux, *Multiple toxin-antitoxin systems in Mycobacterium*  
427 *tuberculosis*. Toxins (Basel), 2014. **6**(3): p. 1002-20.
- 428 6. Fraikin, N., F. Goormaghtigh, and L. Van Melderen, *Type II Toxin-Antitoxin Systems: Evolution*  
429 *and Revolutions*. J Bacteriol, 2020. **202**(7).
- 430 7. Helaine, S. and E. Kugelberg, *Bacterial persisters: formation, eradication, and experimental*  
431 *systems*. Trends Microbiol, 2014. **22**(7): p. 417-24.
- 432 8. Page, R. and W. Peti, *Toxin-antitoxin systems in bacterial growth arrest and persistence*. Nat  
433 Chem Biol, 2016. **12**(4): p. 208-14.
- 434 9. Ramage, H.R., L.E. Connolly, and J.S. Cox, *Comprehensive functional analysis of Mycobacterium*  
435 *tuberculosis toxin-antitoxin systems: implications for pathogenesis, stress responses, and*  
436 *evolution*. PLoS Genet, 2009. **5**(12): p. e1000767.

- 437 10. Tiwari, P., et al., *MazF ribonucleases promote Mycobacterium tuberculosis drug tolerance and*  
438 *virulence in guinea pigs*. Nat Commun, 2015. **6**: p. 6059.
- 439 11. LeRoux, M., et al., *Stress Can Induce Transcription of Toxin-Antitoxin Systems without Activating*  
440 *Toxin*. Mol Cell, 2020. **79**(2): p. 280-292 e8.
- 441 12. Ramirez, M.V., et al., *MazF6 toxin of Mycobacterium tuberculosis demonstrates antitoxin*  
442 *specificity and is coupled to regulation of cell growth by a Soj-like protein*. BMC Microbiol, 2013.  
443 **13**: p. 240.
- 444 13. Rycroft, J.A., et al., *Activity of acetyltransferase toxins involved in Salmonella persister formation*  
445 *during macrophage infection*. Nat Commun, 2018. **9**(1): p. 1993.
- 446 14. Cheverton, A.M., et al., *A Salmonella Toxin Promotes Persister Formation through Acetylation of*  
447 *tRNA*. Mol Cell, 2016. **63**(1): p. 86-96.
- 448 15. Wilcox, B., et al., *Escherichia coli ltaT is a type II toxin that inhibits translation by acetylating*  
449 *isoleucyl-tRNA<sup>Leu</sup>*. Nucleic Acids Res, 2018. **46**(15): p. 7873-7885.
- 450 16. Qian, H., et al., *Identification and characterization of acetyltransferase-type toxin-antitoxin locus*  
451 *in Klebsiella pneumoniae*. Mol Microbiol, 2018. **108**(4): p. 336-349.
- 452 17. Jurenas, D., et al., *AtaT blocks translation initiation by N-acetylation of the initiator tRNA<sup>fMet</sup>*.  
453 Nat Chem Biol, 2017. **13**(6): p. 640-646.
- 454 18. Zhang, C., et al., *Substrate specificities of Escherichia coli ltaT that acetylates aminoacyl-tRNAs*.  
455 Nucleic Acids Res, 2020. **48**(13): p. 7532-7544.
- 456 19. Yashiro, Y., et al., *Mechanism of aminoacyl-tRNA acetylation by an aminoacyl-tRNA*  
457 *acetyltransferase AtaT from enterohemorrhagic E. coli*. Nat Commun, 2020. **11**(1): p. 5438.
- 458 20. DeJesus, M.A., et al., *Comprehensive Essentiality Analysis of the Mycobacterium tuberculosis*  
459 *Genome via Saturating Transposon Mutagenesis*. mBio, 2017. **8**(1).
- 460 21. Kapopoulou, A., J.M. Lew, and S.T. Cole, *The MycoBrowser portal: a comprehensive and*  
461 *manually annotated resource for mycobacterial genomes*. Tuberculosis (Edinb), 2011. **91**(1): p.  
462 8-13.
- 463 22. Altschul, S.F., et al., *Basic local alignment search tool*. J Mol Biol, 1990. **215**(3): p. 403-10.
- 464 23. Das, G. and U. Varshney, *Peptidyl-tRNA hydrolase and its critical role in protein biosynthesis*.  
465 Microbiology (Reading), 2006. **152**(Pt 8): p. 2191-2195.
- 466 24. Sharma, S., et al., *Structural and functional insights into peptidyl-tRNA hydrolase*. Biochim  
467 Biophys Acta, 2014. **1844**(7): p. 1279-88.
- 468 25. Rock, J.M., et al., *Programmable transcriptional repression in mycobacteria using an orthogonal*  
469 *CRISPR interference platform*. Nat Microbiol, 2017. **2**: p. 16274.
- 470 26. Zainuddin, Z.F. and J.W. Dale, *Does Mycobacterium tuberculosis have plasmids?* Tubercle, 1990.  
471 **71**(1): p. 43-9.
- 472 27. Lobato-Marquez, D., R. Diaz-Orejas, and F. Garcia-Del Portillo, *Toxin-antitoxins and bacterial*  
473 *virulence*. FEMS Microbiol Rev, 2016. **40**(5): p. 592-609.
- 474 28. Sharma, A., et al., *VapC21 Toxin Contributes to Drug-Tolerance and Interacts With Non-cognate*  
475 *VapB32 Antitoxin in Mycobacterium tuberculosis*. Front Microbiol, 2020. **11**: p. 2037.
- 476 29. Talwar, S., et al., *Role of VapBC12 Toxin-Antitoxin Locus in Cholesterol-Induced Mycobacterial*  
477 *Persistence*. mSystems, 2020. **5**(6).
- 478 30. Meehan, C.J., et al., *Whole genome sequencing of Mycobacterium tuberculosis: current*  
479 *standards and open issues*. Nat Rev Microbiol, 2019. **17**(9): p. 533-545.
- 480 31. Stucki, D., et al., *Mycobacterium tuberculosis lineage 4 comprises globally distributed and*  
481 *geographically restricted sublineages*. Nat Genet, 2016. **48**(12): p. 1535-1543.
- 482 32. Liu, Q., et al., *Mycobacterium tuberculosis clinical isolates carry mutational signatures of host*  
483 *immune environments*. Sci Adv, 2020. **6**(22): p. eaba4901.
- 484 33. Rosas-Sandoval, G., et al., *Orthologs of a novel archaeal and of the bacterial peptidyl-tRNA*  
485 *hydrolase are nonessential in yeast*. Proc Natl Acad Sci U S A, 2002. **99**(26): p. 16707-12.
- 486 34. Kabra, A., et al., *Structural characterization of peptidyl-tRNA hydrolase from Mycobacterium*  
487 *smegmatis by NMR spectroscopy*. Biochim Biophys Acta, 2016. **1864**(10): p. 1304-14.
- 488 35. Selvaraj, M., et al., *Structures of new crystal forms of Mycobacterium tuberculosis peptidyl-tRNA*  
489 *hydrolase and functionally important plasticity of the molecule*. Acta Crystallogr Sect F Struct Biol  
490 Cryst Commun, 2012. **68**(Pt 2): p. 124-8.

- 491 36. Alumasa, J.N., et al., *Ribosome Rescue Inhibitors Kill Actively Growing and Nonreplicating*  
492 *Persister Mycobacterium tuberculosis Cells*. ACS Infect Dis, 2017. **3**(9): p. 634-644.
- 493 37. Keiler, K.C., *Mechanisms of ribosome rescue in bacteria*. Nat Rev Microbiol, 2015. **13**(5): p. 285-  
494 97.
- 495 38. Gibson, D.G., et al., *Enzymatic assembly of DNA molecules up to several hundred kilobases*. Nat  
496 Methods, 2009. **6**(5): p. 343-5.
- 497 39. Murphy, K.C., K. Papavinasasundaram, and C.M. Sassetti, *Mycobacterial recombineering*.  
498 Methods Mol Biol, 2015. **1285**: p. 177-99.
- 499 40. Bal, N.C., et al., *Characterization of peptidyl-tRNA hydrolase encoded by open reading frame*  
500 *Rv1014c of Mycobacterium tuberculosis H37Rv*. Biol Chem, 2007. **388**(5): p. 467-79.
- 501 41. N. A. Joshi, J.N.F. Sickle: *A sliding-window, adaptive, quality-based trimming tool for FastQ files*.  
502 [Software] 2011; Available from: Available at <https://github.com/najoshi/sickle>.
- 503 42. Comas, I., et al., *Out-of-Africa migration and Neolithic coexpansion of Mycobacterium*  
504 *tuberculosis with modern humans*. Nat Genet, 2013. **45**(10): p. 1176-82.
- 505 43. Langmead, B. and S.L. Salzberg, *Fast gapped-read alignment with Bowtie 2*. Nat Methods, 2012.  
506 **9**(4): p. 357-9.
- 507 44. Koboldt, D.C., et al., *VarScan 2: somatic mutation and copy number alteration discovery in cancer*  
508 *by exome sequencing*. Genome Res, 2012. **22**(3): p. 568-76.
- 509 45. Li, H., et al., *The Sequence Alignment/Map format and SAMtools*. Bioinformatics, 2009. **25**(16):  
510 p. 2078-9.  
511
